# Supplementary material
Source: PubMed Central journal article supplement (PMC1890487)

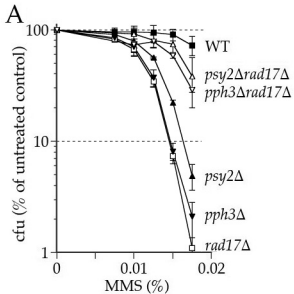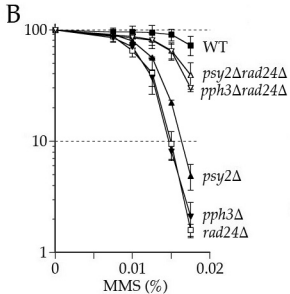

Supplement: pnas_0703252104_1.pdf [file pnas_0703252104_1.pdf]

|            |   |   |   |             |   |   |                   |   |   |
|------------|---|---|---|-------------|---|---|-------------------|---|---|
| YEplac195: | - |   |   | <i>PPH3</i> |   |   | <i>pph3-H112N</i> |   |   |
| Time (h):  | 0 | 2 | 4 | 0           | 2 | 4 | 0                 | 2 | 4 |

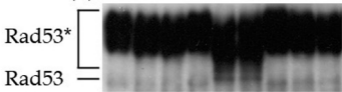

Supplement: pnas_0703252104_2.pdf [file pnas_0703252104_2.pdf]

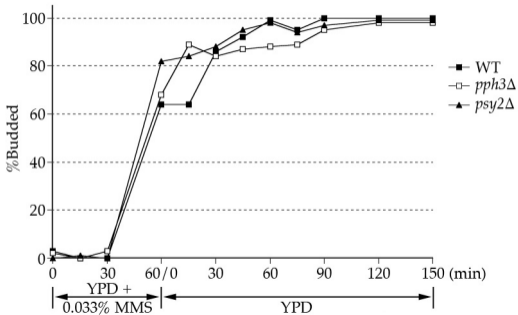

Supplement: pnas_0703252104_3.pdf [file pnas_0703252104_3.pdf]

A

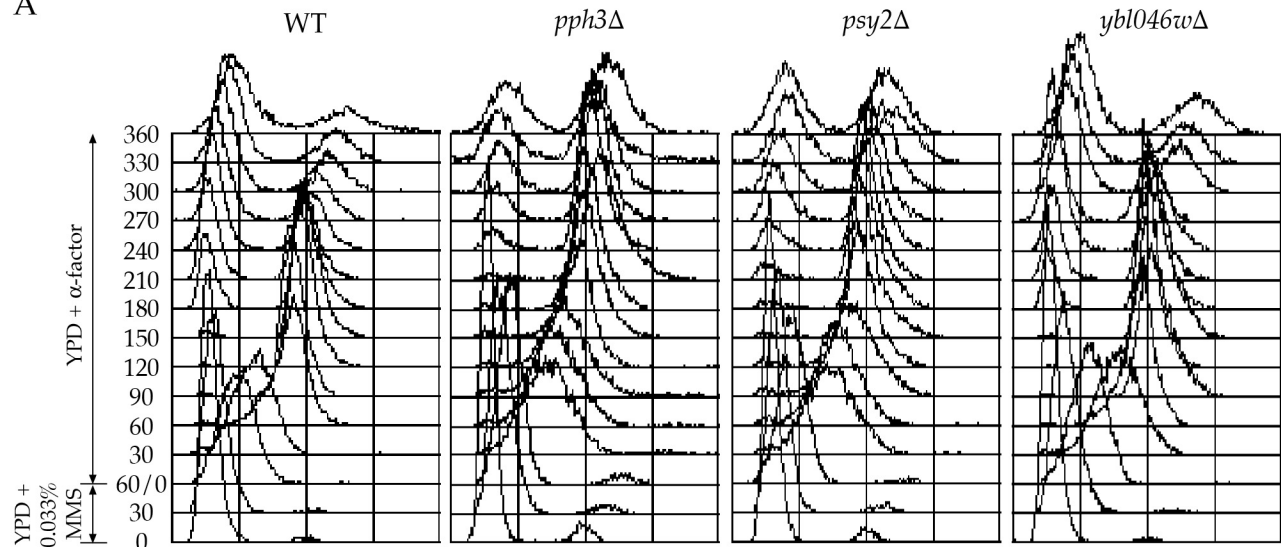

B

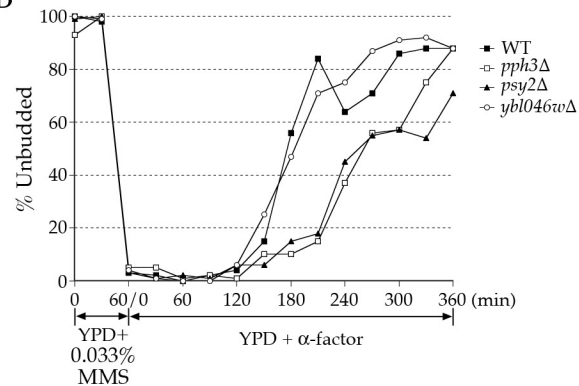

C

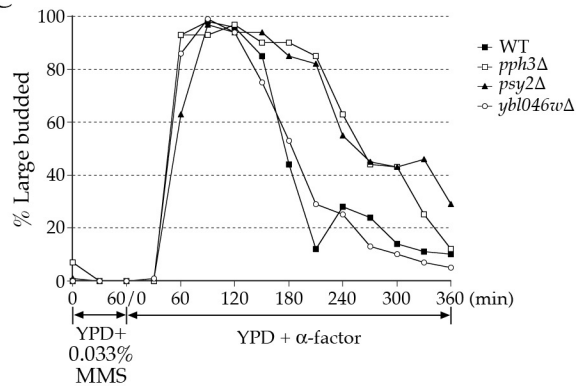

Supplement: pnas_0703252104_4.pdf [file pnas_0703252104_4.pdf]

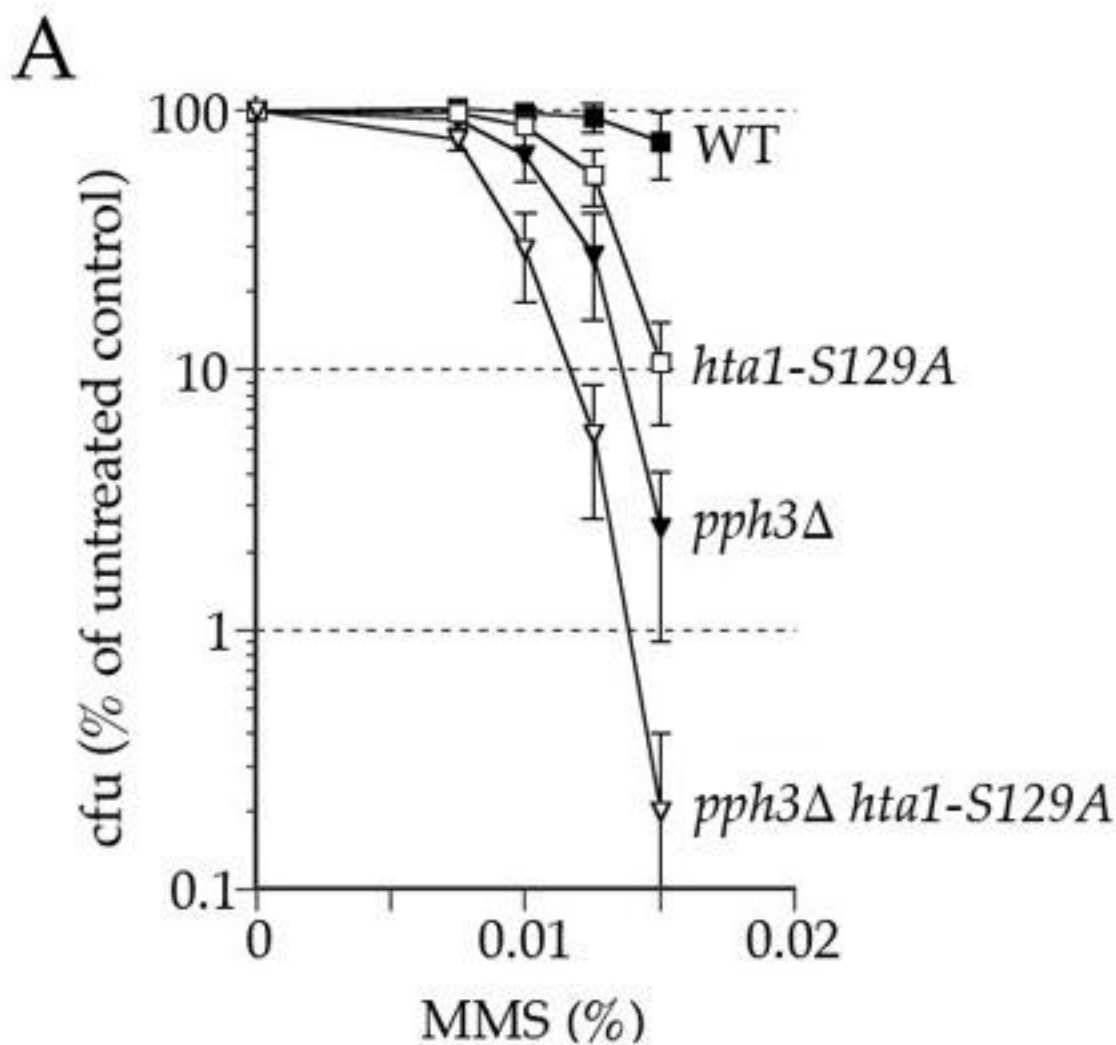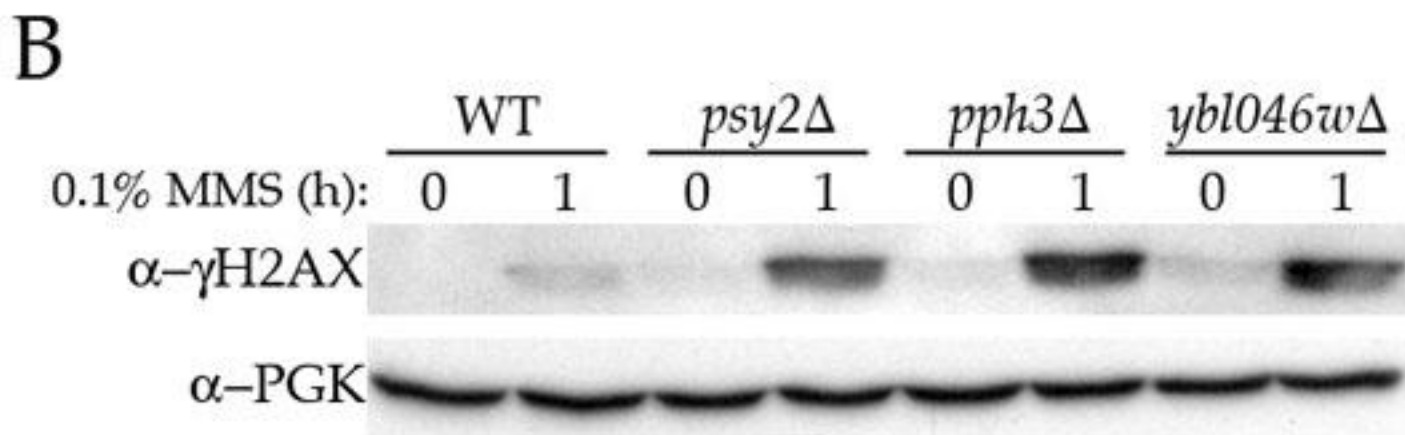

Supplement: pnas_0703252104_5.pdf [file pnas_0703252104_5.pdf]
